# Supplementary material for: Physiological β-catenin signaling controls self-renewal networks and generation of stem-like cells from nasopharyngeal carcinoma
Source: PubMed Central journal article supplement (PMC3819748; doi:10.1186/1471-2121-14-44), 2013-09-27
Supplement: 1471-2121-14-44-S1.pdf [file 1471-2121-14-44-S1.pdf]

## Additional material

**Additional file 1: Table S1.** Expression changes in HONE1 hybrid Cells (compared to parental HONE1 cells) assayed by Stem Cell Signaling PCR Array

| Gene Symbol                | Fold change | Pathways                                 |
|----------------------------|-------------|------------------------------------------|
| ACVR1                      | 3.6351      | TGF- $\beta$ Superfamily Signaling       |
| ACVR1B                     | 1.0512      | TGF- $\beta$ Superfamily Signaling       |
| ACVR1C                     | 4.0897      | TGF- $\beta$ Superfamily Signaling       |
| ACVR2A                     | 38.9081     | TGF- $\beta$ Superfamily Signaling       |
| ACVR2B                     | 4.9314      | TGF- $\beta$ Superfamily Signaling       |
| ACVRL1                     | 0.8134      | TGF- $\beta$ Superfamily Signaling       |
| AMHR2                      | 1.8302      | TGF- $\beta$ Superfamily Signaling       |
| BCL9                       | 0.8901      | Wnt Signaling                            |
| BCL9L                      | 1.948       | Wnt Signaling                            |
| BMPR1A                     | 6.3731      | TGF- $\beta$ Superfamily Signaling       |
| BMPR1B                     | 5.5098      | TGF- $\beta$ Superfamily Signaling       |
| BMPR2                      | 2.0591      | TGF- $\beta$ Superfamily Signaling       |
| CREBBP                     | 3.9231      | TGF- $\beta$ Superfamily Signaling       |
| CTNNB1 ( $\beta$ -CATENIN) | 4.0615      | Wnt Signaling                            |
| E2F5                       | 1.6495      | TGF- $\beta$ Superfamily Signaling       |
| ENG                        | 0.2817      | TGF- $\beta$ Superfamily Signaling       |
| EP300                      | 1.7802      | TGF- $\beta$ Superfamily Signaling       |
| FGFR1                      | 1.0439      | Fibroblast Growth Factor (FGF) Signaling |
| FGFR2                      | 15.8016     | Fibroblast Growth Factor (FGF) Signaling |
| FGFR3                      | 0.7032      | Fibroblast Growth Factor (FGF) Signaling |
| FGFR4                      | 0.1951      | Fibroblast Growth Factor (FGF) Signaling |
| FZD1                       | 1.5933      | Wnt Signaling                            |
| FZD2                       | 0.2256      | Wnt Signaling                            |
| FZD3                       | 13.6611     | Wnt Signaling                            |
| FZD4                       | 2.0734      | Wnt Signaling                            |
| FZD5                       | 9.727       | Wnt Signaling                            |
| FZD6                       | 13.0141     | Wnt Signaling                            |
| FZD7                       | 0.4836      | Wnt Signaling                            |
| FZD8                       | 3.3683      | Wnt Signaling                            |
| FZD9                       | 0.5996      | Wnt Signaling                            |
| GLI1                       | 0.5556      | Hedgehog Signaling                       |
| GLI2                       | 0.4803      | Hedgehog Signaling                       |
| GLI3                       | 1.6725      | Hedgehog Signaling                       |
| IL6ST                      | 16.3589     | Pluripotency Maintenance                 |

|             |         |                                    |
|-------------|---------|------------------------------------|
| LEF1        | 1.6609  | Wnt Signaling                      |
| LIFR        | 17.9014 | Pluripotency Maintenance           |
| LRP5        | 0.8247  | Wnt Signaling                      |
| LRP6        | 3.4629  | Wnt Signaling                      |
| LTBP1       | 3.9779  | TGF- $\beta$ Superfamily Signaling |
| LTBP2       | 2.8919  | TGF- $\beta$ Superfamily Signaling |
| LTBP3       | 0.5042  | TGF- $\beta$ Superfamily Signaling |
| LTBP4       | 2.6982  | TGF- $\beta$ Superfamily Signaling |
| NCSTN       | 0.9474  | Notch Signaling                    |
| NFAT5       | 29.0809 | Wnt Signaling                      |
| NFATC1      | 0.6338  | Wnt Signaling                      |
| NFATC2      | 0.5404  | Wnt Signaling                      |
| NFATC3      | 1.9616  | Wnt Signaling                      |
| NFATC4      | 29.2832 | Wnt Signaling                      |
| NOTCH1      | 0.3615  | Notch Signaling                    |
| NOTCH2      | 1.3398  | Notch Signaling                    |
| NOTCH3      | 1.7195  | Notch Signaling                    |
| NOTCH4      | 1.5713  | Notch Signaling                    |
| PSEN1       | 1.0014  | Notch Signaling                    |
| PSEN2       | 0.5832  | Notch Signaling                    |
| PSENEN      | 0.3516  | Notch Signaling                    |
| PTCH1       | 1.2243  | Hedgehog Signaling                 |
| PTCHD2      | 1.4661  | Hedgehog Signaling                 |
| PYGO2       | 0.1499  | Wnt Signaling                      |
| RBL1        | 3.5113  | TGF- $\beta$ Superfamily Signaling |
| RBL2        | 5.7438  | TGF- $\beta$ Superfamily Signaling |
| RBPJL       | 1.2852  | Notch Signaling                    |
| RGMA        | 0.4938  | TGF- $\beta$ Superfamily Signaling |
| SMAD1       | 2.912   | TGF- $\beta$ Superfamily Signaling |
| SMAD2       | 27.3222 | TGF- $\beta$ Superfamily Signaling |
| SMAD3       | 2.7359  | TGF- $\beta$ Superfamily Signaling |
| SMAD4       | 2.5527  | TGF- $\beta$ Superfamily Signaling |
| SMAD5       | 21.887  | TGF- $\beta$ Superfamily Signaling |
| SMAD6       | 0.274   | TGF- $\beta$ Superfamily Signaling |
| SMAD7       | 1.7802  | TGF- $\beta$ Superfamily Signaling |
| SMAD9       | 10.4977 | TGF- $\beta$ Superfamily Signaling |
| SMO         | 1.5823  | Hedgehog Signaling                 |
| SP1         | 1.1111  | TGF- $\beta$ Superfamily Signaling |
| STAT3       | 1.3775  | Pluripotency Maintenance           |
| SUFU        | 0.6122  | Hedgehog Signaling                 |
| TCF7 (TCF1) | 1.2941  | Wnt Signaling                      |

|               |        |                                    |
|---------------|--------|------------------------------------|
| TCF7L1 (TCF3) | 1.7195 | Wnt Signaling                      |
| TCF7L2 (TCF4) | 2.3817 | Wnt Signaling                      |
| TGFBR1        | 6.3731 | TGF- $\beta$ Superfamily Signaling |
| TGFBR2        | 4.9657 | TGF- $\beta$ Superfamily Signaling |
| TGFBR3        | 3.7633 | TGF- $\beta$ Superfamily Signaling |
| TGFBRAP1      | 0.8022 | TGF- $\beta$ Superfamily Signaling |
| VANGL2        | 1.1991 | Wnt Signaling                      |
| ZEB2          | 7.1206 | TGF- $\beta$ Superfamily Signaling |

[http://sabiosciences.com/rt\\_pcr\\_product/HTML/PAHS-047A.html](http://sabiosciences.com/rt_pcr_product/HTML/PAHS-047A.html)

## Additional file 2: Table S2. Primers used in RT-PCR and qPCR analyses

| Name                      | Sequences                 | Product size (bp) | Annealing temperature (°C) | Reference <sup>d</sup>   |
|---------------------------|---------------------------|-------------------|----------------------------|--------------------------|
| GAPDH F <sup>a</sup>      | GAAGGTGAAGGTCCGAGTC       | 226               | 55                         |                          |
| GAPDH R <sup>a</sup>      | GAAGATGGTATGGGATTC        |                   |                            |                          |
| Sox2 F                    | CAGTACAACCTCCATGACCAGCTCG | 277               | 55                         |                          |
| Sox2 R                    | AGTGCTGGGACATGTGAAGTCTGC  |                   |                            |                          |
| qSOX2 F <sup>a</sup>      | TGCTGCCTCTTTAAGACTAGGAC   | 75                | 60                         |                          |
| qSOX2 R <sup>a</sup>      | CCTGGGGCTCAAACCTTCTCT     |                   |                            |                          |
| CTNNB1 F                  | TAGAGGCTCTTGTGCGTACTGTCC  | 385               | 55                         |                          |
| CTNNB1 R                  | CCTTCAACTATTTCTCCATGCGG   |                   |                            |                          |
| CTNNB1 1F <sup>b</sup>    | GTCCTTCACTCAAGAACAAGTAGC  | 474               | 55                         |                          |
| CTNNB1 1R <sup>b</sup>    | GCCAGTAAGCCCTCACGATGATGG  |                   |                            |                          |
| qCTNNB1 F <sup>a</sup>    | GGCTTGGAATGAGACTGCTGAT    | 115               | 60                         |                          |
| qCTNNB1 R <sup>a</sup>    | CTGGCCATATCCACCAGAGTG     |                   |                            |                          |
| Klf4 F                    | CGAACCCACACAGGTGAGAA      | 68                | 55                         | [1]                      |
| Klf4 R                    | GAGCGGGCGAATTTCCAT        |                   |                            |                          |
| qKLF4 F <sup>a</sup>      | GGGAGAAGACTGCGTCA         | 88                | 62                         |                          |
| qKLF4 R <sup>a</sup>      | GGAAGCACTGGGGGAAGT        |                   |                            |                          |
| c-Myc F                   | AGGCCACAGCAAACCTCCTC      | 300               | 59                         |                          |
| c-Myc R                   | TCCAACCTCCGGGATCTGGTC     |                   |                            |                          |
| Axin2 F                   | CGCAGCAGTTTGGCGGCAGCA     | 350               | 55                         |                          |
| Axin2 R                   | AGGGTCCTGGGTGAACAGGTGGG   |                   |                            |                          |
| Tcf1 F                    | CAGTGTCTCCAGCAGCCTG       | 191               | 60                         |                          |
| Tcf1 R                    | GCTGCTGCCCTCATCACCCC      |                   |                            |                          |
| Tcf3 F                    | GAAATCACCAGTCAACCGTAAA    | 251               | 53                         | [2]                      |
| Tcf3 R                    | ACCAGGTTGGGTAGAGCTGCG     |                   |                            |                          |
| Nanog F                   | ACTGGCCGAAGAATAGCAATGG    | 331               | 55                         |                          |
| Nanog R                   | AAGGCAGCCTCCAAGTCACTGG    |                   |                            |                          |
| UPL-NANOG-F1 <sup>a</sup> | ATGCCTCACACGGAGACTGT      | 66                | 60                         |                          |
| UPL-NANOG-R1 <sup>a</sup> | AGGGCTGTCTGAATAAGCA       |                   |                            |                          |
| OCT4 F                    | CTTGCTGCAGAAGTGGGTGGAGGAA | 169               | 55                         | NIH website <sup>c</sup> |
| OCT4 R                    | CTGCAGTGTGGGTTTCGGGCA     |                   |                            |                          |

|                          |                              |     |    |     |
|--------------------------|------------------------------|-----|----|-----|
| UPL-OCT4-F1 <sup>a</sup> | CCTGTCTCCGTCACCACTCT         | 118 | 60 |     |
| UPL-OCT4-R1 <sup>a</sup> | GGCACAACTCCAGGTTTTTC         |     |    |     |
| p53 F                    | TACTGGGACGGAACAGCTTTGAGG     | 276 | 55 |     |
| p53 R                    | CAGCCTGGGCATCCTTGAGTTCC      |     |    |     |
| CD9 F                    | GTGCATGCTGGGACTGTTCTTCGGCTTC | 220 | 55 | [3] |
| CD9 R                    | CACGCCCCAGCCAAACCACAGCAG     |     |    |     |
| CD24 F                   | TGAAGAACATGTGAGAGGTTTGAC     | 208 | 55 | [4] |
| CD24 R                   | GAAAACCTGAATCTCCATTCCACAA    |     |    |     |
| CD44s5                   | GCAGCACTTCAGGAGGTTACAT       | 272 | 55 | [5] |
| CD44s11                  | CAAGAGGGATGCCAAGATGAT        |     |    |     |
| Thy1 F (CD90)            | GACCCGTGAGACAAAGAAGC         | 235 | 50 | [6] |
| Thy1 R (CD90)            | GCCCTCACACTTGACCAGTT         |     |    |     |
| PROM1 F (CD133)          | AATGCACCAGCGACAGAAG          | 194 | 55 | [7] |
| PROM1 R (CD133)          | CATTCAAGAGAGTTCGCAAGTC       |     |    |     |
| Twist1 F                 | GGAGTCCGCAGTCTTACGAG         | 201 | 55 | [8] |
| Twist1 R                 | TCTGGAGGACCTGGTAGAGG         |     |    |     |
| Snail1 F                 | CTGCTACAAGGCCATGTCCGGACC     | 206 | 55 |     |
| Snail1 R                 | CATCCTGAGCAGCCGGACTCTTGG     |     |    |     |
| CyclinD1 F               | CTGTGCTGCGAAGTGGAAACCAT      | 233 | 55 |     |
| CyclinD1 R               | TTCATGGCCAGCGGGAAGACCTC      |     |    |     |
| hSlug-5                  | GGGGAGAAGCCTTTTTCTTG         | 158 | 55 | [9] |
| hSlug-3                  | TCCTCATGTTTGTGCAGGAG         |     |    |     |
| hFn1-5                   | CAGTGGGAGACCTCGAGAAG         | 168 | 53 | [9] |
| hFn1-3                   | TCCCTCGGAACATCAGAAAC         |     |    |     |
| hNcad-5                  | ACAGTGGCCACCTACAAAGG         | 201 | 55 | [9] |
| hNcad-3                  | CCGAGATGGGGTTGATAATG         |     |    |     |
| E-Cadherin F             | TGGAGGAATTCTTGCTTTGC         | 488 | 55 |     |
| E-Cadherin R             | CGTACATGTCAGCCAGCTTC         |     |    |     |

<sup>a</sup> For qPCR analysis. GAPDH F/R were used for both RT-PCR and qPCR analyses

<sup>b</sup>  $\beta$ -catenin exon 3/5 analysis

<sup>c</sup> <http://stemcells.nih.gov/research/nihresearch/scunit/pages/RTPCR.aspx>

<sup>d</sup> References

1. Aasen T, Raya A, Barrero MJ, Garreta E, Consiglio A, Gonzalez F, Vassena R, Bilic J, Pekarik V, Tiscornia G *et al*: **Efficient and rapid generation of induced pluripotent stem cells from human keratinocytes**. *Nat Biotechnol* 2008, **26**(11):1276-1284.
2. Brantjes H, Roose J, van De Wetering M, Clevers H: **All Tcf HMG box transcription factors interact with Groucho-related co-repressors**. *Nucleic Acids Res* 2001, **29**(7):1410-1419.
3. Takahashi K, Tanabe K, Ohnuki M, Narita M, Ichisaka T, Tomoda K, Yamanaka S: **Induction of pluripotent stem cells from adult human fibroblasts by defined factors**. *Cell* 2007, **131**(5):861-872.
4. Schostak M, Krause H, Miller K, Schrader M, Weikert S, Christoph F, Kempkensteffen C, Kollermann J: **Quantitative real-time RT-PCR of CD24 mRNA in the detection of prostate cancer**. *BMC Urol* 2006, **6**:7.

5. Surace C, Arpicco S, Dufay-Wojcicki A, Marsaud V, Bouclier C, Clay D, Cattel L, Renoir JM, Fattal E: **Lipoplexes targeting the CD44 hyaluronic acid receptor for efficient transfection of breast cancer cells.** *Mol Pharm* 2009, **6**(4):1062-1073.
6. Lung HL, Bangarusamy DK, Xie D, Cheung AK, Cheng Y, Kumaran MK, Miller L, Liu ET, Guan XY, Sham JS *et al*: **THY1 is a candidate tumour suppressor gene with decreased expression in metastatic nasopharyngeal carcinoma.** *Oncogene* 2005, **24**(43):6525-6532.
7. Nakamura K, Iinuma H, Aoyagi Y, Shibuya H, Watanabe T: **Predictive value of cancer stem-like cells and cancer-associated genetic markers for peritoneal recurrence of colorectal cancer in patients after curative surgery.** *Oncology* 2010, **78**(5-6):309-315.
8. Lee YJ, Han HJ: **Troglitazone ameliorates high glucose-induced EMT and dysfunction of SGLTs through PI3K/Akt, GSK-3 beta, Snail1, and beta-catenin in renal proximal tubule cells.** *American Journal of Physiology-Renal Physiology* 2010, **298**(5):F1263-F1275.
9. Mani SA, Guo W, Liao MJ, Eaton EN, Ayyanan A, Zhou AY, Brooks M, Reinhard F, Zhang CC, Shipitsin M *et al*: **The epithelial-mesenchymal transition generates cells with properties of stem cells.** *Cell* 2008, **133**(4):704-715.

### Additional file 3: Table S3. Antibodies used

| Antibody   | Concentration       | Catalog # | Company                  |
|------------|---------------------|-----------|--------------------------|
| β-catenin  | 1:1000 <sup>a</sup> | 9587      | Cell Signaling           |
| Oct4       | 1:1000              | 2750      | Cell Signaling           |
| Nanog      | 1:1000              | 4903      | Cell Signaling           |
| Axin2      | 1:1000              | 2151      | Cell Signaling           |
| p53        | 1:1000              | 2527      | Cell Signaling           |
| Klf4       | 1:1000              | 4038      | Cell Signaling           |
| Sox2       | 1:1000              | 3579      | Cell Signaling           |
| E-cadherin | 1:1000 <sup>a</sup> | 610181    | BD Pharmingen            |
| N-cadherin | 1:1000              | ab18203   | Abcam                    |
| CyclinD1   | 1:50                | SC-753    | Santa Cruz Biotechnology |
| Zeb1       | 1:500               | 3396      | Cell Signaling           |
| Fn1        | 1:1000              | 555867    | BD Pharmingen            |
| α-tubulin  | 1:5000              | CP06      | Calbiochem               |

<sup>a</sup> For IHC staining, the concentration is 1:50
